# Supplementary material for: Neuropeptide Y Stimulates Proliferation and Migration of Vascular Smooth Muscle Cells from Pregnancy Hypertensive Rats via Y1 and Y5 Receptors
Source: PubMed Central journal article supplement (PMC4488588; doi:10.1371/journal.pone.0131124), 2015-07-01
Supplement: pone.0131124.s001.pdf [file pone.0131124.s001.pdf]

## The changes of blood pressure

| mmHg        | Systolic blood pressure |                   | Diastolic blood pressure |                   | Mean arterial pressure |                   |
|-------------|-------------------------|-------------------|--------------------------|-------------------|------------------------|-------------------|
|             | Saline group            | L-NAME group      | Saline group             | L-NAME group      | Saline group           | L-NAME group      |
| N1          | 101                     | 145               | 80                       | 103               | 87                     | 117               |
|             | 137                     | 141               | 64                       | 116               | 89                     | 124               |
|             | 116                     | 150               | 82                       | 107               | 93                     | 121               |
|             | <b>118</b>              | <b>145.33</b>     | <b>75.33</b>             | <b>108.67</b>     | <b>89.67</b>           | <b>120.67</b>     |
| N2          | 91                      | 136               | 77                       | 120               | 82                     | 125               |
|             | 105                     | 144               | 72                       | 105               | 83                     | 118               |
|             | 97                      | 137               | 73                       | 107               | 81                     | 117               |
|             | <b>97.67</b>            | <b>139</b>        | <b>74</b>                | <b>110.67</b>     | <b>82</b>              | <b>120</b>        |
| N3          | 109                     | 148               | 71                       | 106               | 84                     | 120               |
|             | 110                     | 152               | 80                       | 101               | 90                     | 118               |
|             | 114                     | 153               | 68                       | 108               | 83                     | 123               |
|             | <b>111</b>              | <b>151</b>        | <b>73</b>                | <b>105</b>        | <b>85.67</b>           | <b>120.33</b>     |
| N4          | 105                     | 147               | 78                       | 114               | 87                     | 125               |
|             | 109                     | 136               | 64                       | 113               | 79                     | 121               |
|             | 109                     | 142               | 75                       | 114               | 86                     | 123               |
|             | <b>107.67</b>           | <b>141.67</b>     | <b>72.33</b>             | <b>113.67</b>     | <b>84</b>              | <b>123</b>        |
| <b>mean</b> | <b>108.58</b>           | <b>144.25</b>     | <b>73.67</b>             | <b>109.5</b>      | <b>85.33</b>           | <b>121</b>        |
| <b>SD</b>   | <b>8.46</b>             | <b>5.2</b>        | <b>1.31</b>              | <b>3.64</b>       | <b>3.25</b>            | <b>1.36</b>       |
| <b>P =</b>  |                         | <b>0.31718196</b> |                          | <b>0.61741671</b> |                        | <b>0.87111009</b> |

## The changes of NPY concentrations

(From Beijing DORUN International Technology Co., Ltd)

| pg/ml       | Saline group      | L-NAME             | Saline/L-NAME      |
|-------------|-------------------|--------------------|--------------------|
| N1          | 148.782           | 188.334            | 1.26583861         |
| N2          | 145.525           | 177.696            | 1.221068545        |
| N3          | 146.606           | 184.899            | 1.261196677        |
| N4          | 120.874           | 159.382            | 1.318579678        |
| <b>mean</b> | <b>140.44675</b>  | <b>177.57775</b>   | <b>1.2669483</b>   |
| <b>SD</b>   | <b>13.1186117</b> | <b>12.91506764</b> | <b>0.049009348</b> |
| <b>P=</b>   |                   | <b>0.000201343</b> |                    |

## The changes of opening angles

| degree °    | Saline group       | L-NAME             |
|-------------|--------------------|--------------------|
| N1          | 75.298325          | 127.3272           |
| N2          | 70.6268            | 111.772            |
| N3          | 82.84118           | 115.9203           |
| N4          | 74.379015          | 126.5961           |
| <b>mean</b> | <b>75.78633</b>    | <b>120.4039</b>    |
| <b>SD</b>   | <b>5.118930316</b> | <b>7.765045402</b> |
| <b>P=</b>   |                    | <b>0.002380487</b> |

## The changes of aortic media thickness

| Pixel       | Saline group       | L-NAME             |
|-------------|--------------------|--------------------|
| N1          | 23.64368365        | 33.82834395        |
| N2          | 24.93062633        | 42.76504777        |
| N3          | 23.94824841        | 34.72993631        |
| N4          | 24.70334395        | 33.28646497        |
| N5          |                    | 32.52998938        |
| <b>mean</b> | <b>24.30647558</b> | <b>35.42795648</b> |
| <b>SD</b>   | <b>0.609559542</b> | <b>4.179207467</b> |
| <b>P=</b>   |                    | <b>0.000622062</b> |
