# Supplementary material for: Neuropeptide Y Stimulates Proliferation and Migration of Vascular Smooth Muscle Cells from Pregnancy Hypertensive Rats via Y1 and Y5 Receptors
Source: PubMed Central journal article supplement (PMC4488588; doi:10.1371/journal.pone.0131124), 2015-07-01
Supplement: pone.0131124.s002.pdf [file pone.0131124.s002.pdf]

**The expression of NPY1R , NPY2R and  
NPY5R in thoracic aorta**

|             | NPY1R/GAPDH  |                    | NPY2R/GAPDH  |                   | NPY5R/GAPDH  |                    |
|-------------|--------------|--------------------|--------------|-------------------|--------------|--------------------|
|             | Saline group | L-NAME group       | Saline group | L-NAME group      | Saline group | L-NAME group       |
| N1          | 1            | 0.853772           | 1            | 0.805551          | 1            | 1.563011           |
| N2          | 1            | 1.030239           | 1            | 1.028853          | 1            | 2.456183           |
| N3          | 1            | 0.959791           | 1            | 0.931073          | 1            | 2.41064            |
| N4          | 1            | 1.114224           | 1            | 1.083891          | 1            |                    |
| <b>mean</b> | <b>1</b>     | <b>0.9895065</b>   | <b>1</b>     | <b>0.962342</b>   | <b>1</b>     | <b>2.143278</b>    |
| <b>SD</b>   | <b>0</b>     | <b>0.11033352</b>  | <b>0</b>     | <b>0.12214614</b> | <b>0</b>     | <b>0.503041633</b> |
| <b>P=</b>   |              | <b>0.427706839</b> |              | <b>0.28007369</b> |              | <b>0.008504987</b> |

**The expression of STAT3, p-STAT3  
in thoracic aorta**

|             | T-STAT3/GAPDH |                    | p-STAT3 705/T-STAT3 |                   | p-STAT3 727/T-STAT3 |                    |
|-------------|---------------|--------------------|---------------------|-------------------|---------------------|--------------------|
|             | Saline group  | L-NAME group       | Saline group        | L-NAME group      | Saline group        | L-NAME group       |
| N1          | 1             | 1.263217           | 1                   | 0.723999435       | 1                   | 1.387695           |
| N2          | 1             | 0.869826           | 1                   | 0.592494977       | 1                   | 1.504995           |
| N3          | 1             | 1.147434           | 1                   | 1.046801233       | 1                   | 1.487212           |
| N4          |               |                    | 1                   | 1.468412328       |                     |                    |
| <b>mean</b> | <b>1</b>      | <b>1.093492333</b> | <b>1</b>            | <b>0.95792699</b> | <b>1</b>            | <b>1.459967333</b> |
| <b>SD</b>   | <b>0</b>      | <b>0.165068465</b> | <b>0</b>            | <b>0.39019507</b> | <b>0</b>            | <b>0.051617351</b> |
| <b>P=</b>   |               | <b>0.234007612</b> |                     | <b>0.41820186</b> |                     | <b>0.00011411</b>  |

## The expression of c-Fos, PCNA in thoracic aorta

|             | c-Fos/GAPDH  |                    | PCNA/GAPDH   |                   |
|-------------|--------------|--------------------|--------------|-------------------|
|             | Saline group | L-NAME group       | Saline group | L-NAME group      |
| N1          | 1            | 1.296638           | 1            | 1.773716          |
| N2          | 1            | 1.12516            | 1            | 1.386186          |
| N3          | 1            | 1.06416            | 1            | 1.304726          |
| N4          |              |                    | 1            | 1.687869          |
| <b>mean</b> | <b>1</b>     | <b>1.161986</b>    | <b>1</b>     | <b>1.53812425</b> |
| <b>SD</b>   | <b>0</b>     | <b>0.098416194</b> | <b>0</b>     | <b>0.19715916</b> |
| <b>P=</b>   |              | <b>0.040227549</b> |              | <b>0.00323305</b> |
