# Supplementary material for: Neuropeptide Y Stimulates Proliferation and Migration of Vascular Smooth Muscle Cells from Pregnancy Hypertensive Rats via Y1 and Y5 Receptors
Source: PubMed Central journal article supplement (PMC4488588; doi:10.1371/journal.pone.0131124), 2015-07-01
Supplement: pone.0131124.s003.pdf [file pone.0131124.s003.pdf]

**The proliferation of cultured VSMCs were stimulated  
by NPY for 24 hours**

|             | 0 M NPY  | 10 <sup>-6</sup> M NPY | 10 <sup>-8</sup> M NPY | 10 <sup>-10</sup> M NPY | 10 <sup>-12</sup> M NPY | 10% serum          |
|-------------|----------|------------------------|------------------------|-------------------------|-------------------------|--------------------|
| N1          | 1        | 1.63                   | 1.080373               | 1.502415459             | 2.394958                | 2.23               |
| N2          | 1        | 1.816425121            | 1.4251208              | 1.215730337             | 1.095328                | 2.22705314         |
| N3          | 1        | 1.4614                 | 1.0314961              | 1.080373832             | 1.188764                | 1.8                |
| N4          | 1        | 1.379775281            | 1.1483146              |                         | 1.647343                | 1.569              |
| N5          |          |                        |                        |                         | 1.0682415               |                    |
| <b>mean</b> | <b>1</b> | <b>1.5719001</b>       | <b>1.171326</b>        | <b>1.26617321</b>       | <b>1.478927</b>         | <b>1.956513285</b> |
| <b>SD</b>   | <b>0</b> | <b>0.193468604</b>     | <b>0.175847</b>        | <b>0.21549512</b>       | <b>0.562913</b>         | <b>0.32794804</b>  |
| <b>P=</b>   |          | <b>0.000521037</b>     | <b>0.049627</b>        | <b>0.02541437</b>       | <b>0.046807</b>         | <b>0.000292808</b> |

**The proliferation of cultured VSMCs were stimulated  
by pre-incubated with NPY receptor antagonists**

|             |            | NPY<br>(10 <sup>-6</sup> M) | NPY receptor antagonists (10 <sup>-7</sup> M) + NPY(10 <sup>-6</sup> M) |                  |                  |                     |                     |                     |                       |
|-------------|------------|-----------------------------|-------------------------------------------------------------------------|------------------|------------------|---------------------|---------------------|---------------------|-----------------------|
|             | 0 M<br>NPY | DMSO                        | Y1R<br>antagonist                                                       | 2R<br>antagonist | 5R<br>antagonist | 1+2R<br>antagonists | 2+5R<br>antagonists | 1+5R<br>antagonists | 1+2+5R<br>antagonists |
| N1          | 1          | 1.626140                    | 1.534954                                                                | 1.632219         | 1.306991         | 1.097264            | 0.881459            | 0.860182            | 0.951368              |
| N2          | 1          | 1.606232                    | 1.371105                                                                | 1.130312         | 1.257790         | 0.974504            | 0.915014            | 0.997167            | 0.923513              |
| N3          | 1          | 1.742382                    | 1.614958                                                                | 1.506925         | 1.634349         | 1.739612            | 1.257618            | 0.908587            | 0.941828              |
| N4          | 1          | 1.560137                    | 1.494845                                                                | 1.536082         | 1.357388         | 1.305842            | 1.120275            | 0.941581            | 0.934708              |
| <b>mean</b> | <b>1</b>   | <b>1.633723</b>             | <b>1.503966</b>                                                         | <b>1.451385</b>  | <b>1.389130</b>  | <b>1.279306</b>     | <b>1.043591</b>     | <b>0.926879</b>     | <b>0.937854</b>       |
| <b>SD</b>   | <b>0</b>   | <b>0.077535</b>             | <b>0.101677</b>                                                         | <b>0.220641</b>  | <b>0.168461</b>  | <b>0.335971</b>     | <b>0.177489</b>     | <b>0.057560</b>     | <b>0.011747</b>       |
| <b>P=</b>   |            |                             | <b>0.088717</b>                                                         | <b>0.169934</b>  | <b>0.038650</b>  | <b>0.085555</b>     | <b>0.000889</b>     | <b>0.000006</b>     | <b>0.000002</b>       |
