# Supplementary material for: Neuropeptide Y Stimulates Proliferation and Migration of Vascular Smooth Muscle Cells from Pregnancy Hypertensive Rats via Y1 and Y5 Receptors
Source: PubMed Central journal article supplement (PMC4488588; doi:10.1371/journal.pone.0131124), 2015-07-01
Supplement: pone.0131124.s004.pdf [file pone.0131124.s004.pdf]

**The migration of cultured VSMCs were stimulated  
by NPY for 24 hours**

|             | 0 M NPY      | 10 <sup>-6</sup> M NPY | 10 <sup>-8</sup> M NPY | 10 <sup>-10</sup> M NPY | 10 <sup>-12</sup> M NPY | 10% serum       |
|-------------|--------------|------------------------|------------------------|-------------------------|-------------------------|-----------------|
| N1          | 3.21%        | 29.18%                 | 22.16%                 | 22.57%                  | 16.84%                  | 56.08%          |
| N2          | 9.35%        | 28.93%                 |                        | 17.44%                  | 14.97%                  | 49.29%          |
| N3          | 8.07%        | 29.23%                 | 18.68%                 | 18.45%                  | 18.86%                  | 51.62%          |
| N4          | 10.16%       | 27.51%                 | 26.48%                 | 14.89%                  | 14.72%                  | 41.63%          |
| <b>mean</b> | <b>7.70%</b> | <b>28.71%</b>          | <b>22.44%</b>          | <b>18.34%</b>           | <b>16.35%</b>           | <b>49.66%</b>   |
| <b>SD</b>   | <b>2.70%</b> | <b>0.70%</b>           | <b>3.19%</b>           | <b>2.76%</b>            | <b>1.66%</b>            | <b>5.24%</b>    |
| <b>P=</b>   |              | <b>0.000012</b>        | <b>0.002520</b>        | <b>0.003081</b>         | <b>0.003228</b>         | <b>0.000017</b> |

**The migration of cultured VSMCs were  
stimulated by NPY for 48 hours**

|             | 0 M NPY       | 10 <sup>-6</sup> M NPY | 10 <sup>-8</sup> M NPY | 10 <sup>-10</sup> M NPY | 10 <sup>-12</sup> M NPY | 10% serum         |
|-------------|---------------|------------------------|------------------------|-------------------------|-------------------------|-------------------|
| N1          | 11.95%        | 43.79%                 | 28.62%                 | 23.23%                  | 25.29%                  | 100.00%           |
| N2          | 14.62%        | 38.55%                 |                        | 25.07%                  | 21.89%                  | 100.00%           |
| N3          | 18.95%        | 41.68%                 | 24.59%                 | 21.19%                  | 29.45%                  | 100.00%           |
| N4          | 20.94%        | 40.10%                 | 37.05%                 |                         | 22.08%                  | 100.00%           |
| <b>mean</b> | <b>16.61%</b> | <b>41.03%</b>          | <b>30.09%</b>          | <b>23.17%</b>           | <b>24.68%</b>           | <b>100.00%</b>    |
| <b>SD</b>   | <b>4.08%</b>  | <b>2.24%</b>           | <b>6.36%</b>           | <b>1.94%</b>            | <b>3.55%</b>            | <b>0.00%</b>      |
| <b>P=</b>   |               | <b>0.000044</b>        | <b>0.018265</b>        | <b>0.026415</b>         | <b>0.024523</b>         | <b>0.00000001</b> |

**The migration of cultured VSMCs were stimulated  
by NPY receptor antagonists for 24 hours**

|                                               |              | NPY<br>(10 <sup>-6</sup> M) | NPY receptor antagonists (10 <sup>-7</sup> M) + NPY(10 <sup>-6</sup> M) |                  |                  |                    |                    |                    |                      |
|-----------------------------------------------|--------------|-----------------------------|-------------------------------------------------------------------------|------------------|------------------|--------------------|--------------------|--------------------|----------------------|
|                                               | 0 M<br>NPY   | DMSO                        | 1R<br>antagonist                                                        | 2R<br>antagonist | 5R<br>antagonist | 1+2R<br>antagonist | 2+5R<br>antagonist | 1+5R<br>antagonist | 1+2+5R<br>antagonist |
| N1                                            | 10.28%       | 24.04%                      | 11.22%                                                                  | 15.38%           | 11.86%           | 13.51%             | 9.61%              | 14.28%             | 12.02%               |
| N2                                            | 10.97%       | 23.60%                      | 12.64%                                                                  | 19.12%           | 7.42%            | 13.89%             | 13.91%             | 11.14%             | 15.52%               |
| N3                                            | 8.47%        | 23.29%                      | 13.35%                                                                  | 13.80%           | 16.09%           | 11.26%             | 13.85%             | 16.72%             | 11.70%               |
| N4                                            | 8.68%        | 24.55%                      | 15.68%                                                                  | 14.00%           | 15.20%           | 10.66%             | 10.61%             | 10.28%             | 9.71%                |
| <b>mean</b>                                   | <b>9.60%</b> | <b>23.87%</b>               | <b>13.22%</b>                                                           | <b>15.57%</b>    | <b>12.64%</b>    | <b>12.33%</b>      | <b>12.00%</b>      | <b>13.11%</b>      | <b>12.23%</b>        |
| <b>SD</b>                                     | <b>1.22%</b> | <b>0.55%</b>                | <b>1.86%</b>                                                            | <b>2.47%</b>     | <b>3.93%</b>     | <b>1.61%</b>       | <b>2.21%</b>       | <b>2.96%</b>       | <b>2.42%</b>         |
| <b>P=</b><br>(v.s. 10 <sup>-6</sup><br>M NPY) |              |                             | <b>0.001064</b>                                                         | <b>0.008330</b>  | <b>0.010234</b>  | <b>0.001088</b>    | <b>0.003027</b>    | <b>0.007673</b>    | <b>0.003561</b>      |
| <b>P=</b><br>(v.s. 0 M<br>NPY)                |              | <b>0.000255</b>             | <b>0.082949</b>                                                         | <b>0.004860</b>  | <b>0.320036</b>  | <b>0.035343</b>    | <b>0.151260</b>    | <b>0.141755</b>    | <b>0.099545</b>      |

**The migration of cultured VSMCs were stimulated  
by NPY receptor antagonists for 48 hours**

|                                               |               | NPY<br>(10 <sup>-6</sup> M) | NPY receptor antagonists (10 <sup>-7</sup> M) + NPY(10 <sup>-6</sup> M) |                  |                  |                    |                    |                    |                      |
|-----------------------------------------------|---------------|-----------------------------|-------------------------------------------------------------------------|------------------|------------------|--------------------|--------------------|--------------------|----------------------|
|                                               | 0 M<br>NPY    | DMSO                        | 1R<br>antagonist                                                        | 2R<br>antagonist | 5R<br>antagonist | 1+2R<br>antagonist | 2+5R<br>antagonist | 1+5R<br>antagonist | 1+2+5R<br>antagonist |
| N1                                            | 19.38%        | 34.90%                      | 28.38%                                                                  | 23.71%           | 20.97%           | 25.49%             | 18.79%             | 20.90%             | 21.65%               |
| N2                                            | 17.18%        | 33.79%                      | 18.61%                                                                  | 19.76%           | 15.65%           | 18.55%             | 17.75%             | 19.62%             | 16.94%               |
| N3                                            | 18.18%        | 32.24%                      | 23.33%                                                                  | 26.38%           | 25.19%           | 17.50%             | 16.76%             | 18.09%             | 18.79%               |
| N4                                            | 15.73%        | 35.24%                      | 13.43%                                                                  | 18.23%           | 19.76%           | 17.86%             | 17.10%             | 16.64%             | 13.68%               |
| <b>mean</b>                                   | <b>17.62%</b> | <b>34.04%</b>               | <b>20.93%</b>                                                           | <b>22.02%</b>    | <b>20.39%</b>    | <b>19.85%</b>      | <b>17.60%</b>      | <b>18.81%</b>      | <b>17.76%</b>        |
| <b>SD</b>                                     | <b>1.55%</b>  | <b>1.35%</b>                | <b>6.40%</b>                                                            | <b>3.71%</b>     | <b>3.93%</b>     | <b>3.78%</b>       | <b>0.89%</b>       | <b>1.85%</b>       | <b>3.34%</b>         |
| <b>P=</b><br>(v.s. 10 <sup>-6</sup><br>M NPY) |               |                             | <b>0.031509</b>                                                         | <b>0.014839</b>  | <b>0.010352</b>  | <b>0.003556</b>    | <b>0.000098</b>    | <b>0.000868</b>    | <b>0.003576</b>      |
| <b>P=</b><br>(v.s. 0 M<br>NPY)                |               | <b>0.000752</b>             | <b>0.265371</b>                                                         | <b>0.045801</b>  | <b>0.223446</b>  | <b>0.214834</b>    | <b>0.977337</b>    | <b>0.110507</b>    | <b>0.880669</b>      |
