# Supplementary material for: Neuropeptide Y Stimulates Proliferation and Migration of Vascular Smooth Muscle Cells from Pregnancy Hypertensive Rats via Y1 and Y5 Receptors
Source: PubMed Central journal article supplement (PMC4488588; doi:10.1371/journal.pone.0131124), 2015-07-01
Supplement: pone.0131124.s005.pdf [file pone.0131124.s005.pdf]

## The expression of NPY1R , NPY2R and NPY5R in cultured VSMCs

|             | NPY1R/GAPDH |                        | NPY2R/GAPDH |                        | NPY5R/GAPDH |                        |
|-------------|-------------|------------------------|-------------|------------------------|-------------|------------------------|
|             | 0 M NPY     | 10 <sup>-6</sup> M NPY | 0 M NPY     | 10 <sup>-6</sup> M NPY | 0 M NPY     | 10 <sup>-6</sup> M NPY |
| N1          | 1           | 1.47                   | 1           | 1.1                    | 1           | 1.26                   |
| N2          | 1           | 1.24                   | 1           | 1.25                   | 1           | 1.73                   |
| N3          | 1           | 1.11                   | 1           | 1                      | 1           | 1.66                   |
| N4          | 1           | 1.29                   | 1           | 1.01                   | 1           | 1.22                   |
| N5          | 1           | 1.04                   |             |                        | 1           | 1.5                    |
| <b>mean</b> | <b>1</b>    | <b>1.23</b>            | <b>1</b>    | <b>1.09</b>            | <b>1</b>    | <b>1.474</b>           |
| <b>SD</b>   | <b>0</b>    | <b>0.16718253</b>      | <b>0</b>    | <b>0.11575837</b>      | <b>0</b>    | <b>0.229738982</b>     |
| <b>P=</b>   |             | <b>0.01520306</b>      |             | <b>0.17095303</b>      |             | <b>0.001724811</b>     |

## The expression of STAT3, p-STAT3 in cultured VSMCs

|             | T-STAT3/GAPDH |                        | p-STAT3 705/T-STAT3 |                        | p-STAT3 727/T-STAT3 |                        |
|-------------|---------------|------------------------|---------------------|------------------------|---------------------|------------------------|
|             | 0 M NPY       | 10 <sup>-6</sup> M NPY | 0 M NPY             | 10 <sup>-6</sup> M NPY | 0 M NPY             | 10 <sup>-6</sup> M NPY |
| N1          | 1             | 0.819                  | 1                   | 1.34                   | 1                   | 1.25                   |
| N2          | 1             | 0.97                   | 1                   | 1.66                   | 1                   | 1.55                   |
| N3          | 1             | 1.03                   | 1                   | 1.34                   | 1                   | 1.75                   |
| N4          | 1             | 1.02                   | 1                   | 1.57                   | 1                   | 1.52                   |
| N5          | 1             | 0.993                  | 1                   | 1.47                   | 1                   | 1.41                   |
| N6          | 1             | 1.13                   | 1                   | 1.27                   | 1                   | 2.12                   |
| <b>mean</b> | <b>1</b>      | <b>0.993666667</b>     | <b>1</b>            | <b>1.441666667</b>     | <b>1</b>            | <b>1.6</b>             |
| <b>SD</b>   | <b>0</b>      | <b>0.101655628</b>     | <b>0</b>            | <b>0.151712447</b>     | <b>0</b>            | <b>0.303446865</b>     |
| <b>P=</b>   |               | <b>0.881742883</b>     |                     | <b>3.17588E-05</b>     |                     | <b>0.000678106</b>     |

## The expression of c-Fos, PCNA in cultured VSMCs

|             | c-Fos/GAPDH |                        | PCNA/GAPDH |                        |
|-------------|-------------|------------------------|------------|------------------------|
|             | 0 M NPY     | 10 <sup>-6</sup> M NPY | 0 M NPY    | 10 <sup>-6</sup> M NPY |
| N1          | 1           | 1.28                   | 1          | 1.36                   |
| N2          | 1           | 1.44                   | 1          | 1.29                   |
| N3          | 1           | 1.66                   | 1          | 1.35                   |
| N4          | 1           | 1.23                   | 1          | 1.67                   |
| <b>mean</b> | <b>1</b>    | <b>1.4025</b>          | <b>1</b>   | <b>1.4175</b>          |
| <b>SD</b>   | <b>0</b>    | <b>0.19362765</b>      | <b>0</b>   | <b>0.171148084</b>     |
| <b>P=</b>   |             | <b>0.005961233</b>     |            | <b>0.002769544</b>     |
